# Supplementary material for: Separating the redox couple for highly efficient solid-state dye-sensitized solar cells
Source: Royal Society of Chemistry journal article supplement (doi:10.1039/c4cp00628c), 2014-01-01
Supplement: c4cp00628c1.pdf [file c4cp00628c1.pdf]

# Supporting Information for

## Separating Redox Couple for Highly Efficient Solid-State Dye-Sensitized Solar Cells

Juan Li, Wei Zhang, Lu Zhang and Zhong-Sheng Wang\*

Department of Chemistry, Lab of Advanced Materials, Fudan University, 2205 Songhu  
Road, Shanghai 200438, P. R. China

\* E-mail: zs.wang@fudan.edu.cn

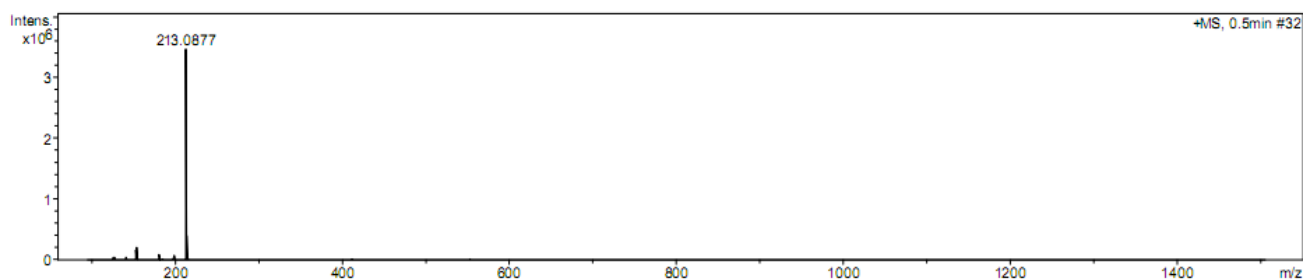

**Figure S1.** High-resolution mass spectrum of DEII

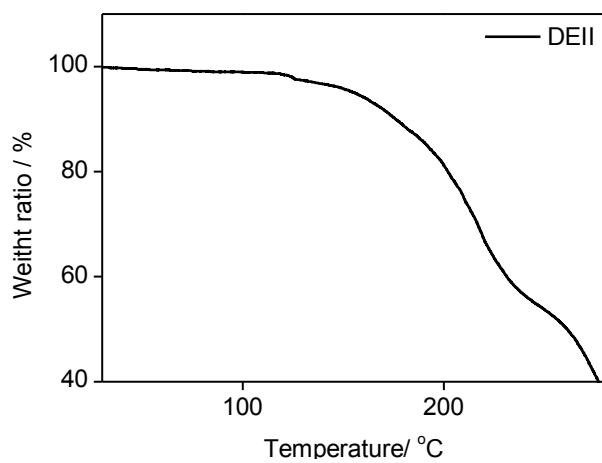

**Figure S2.** TGA curve for DEII

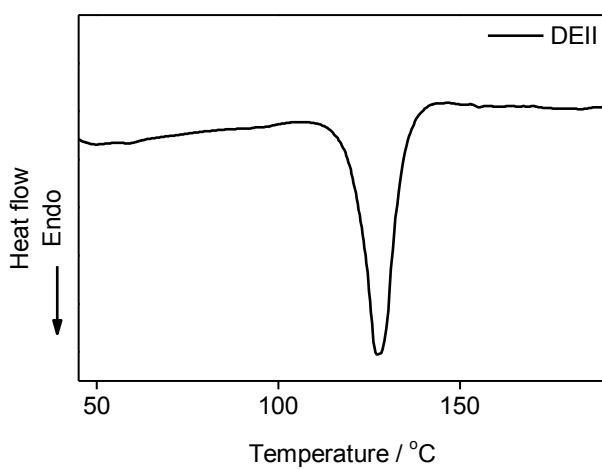

**Figure S3.** DSC curve for DEII

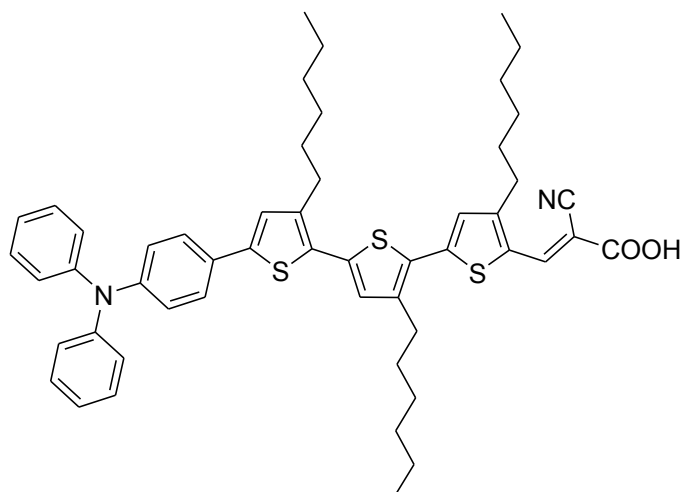

**Figure S4.** Chemical structure of the organic dye (FNE29) used in this work

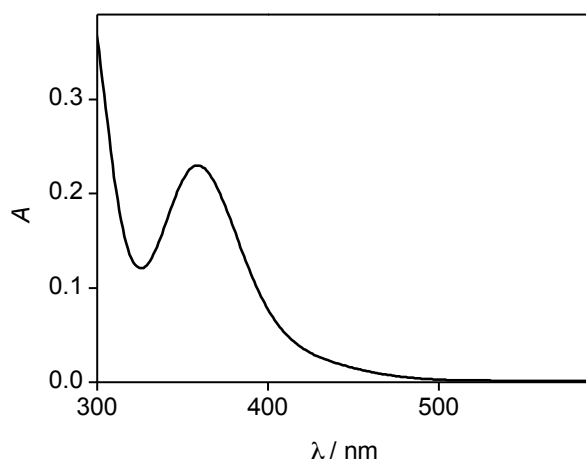

**Figure S5.** UV-vis spectrum of DEII in methanol (0.01 M)
